# Supplementary material for: Diversity and specificity of microsatellites within Aspergillus section Fumigati
Source: PubMed Central journal article supplement (PMC3438126; doi:10.1186/1471-2180-12-154), 2012-07-28
Supplement: 1471-2180-12-154-S2.pdf [file 1471-2180-12-154-S2.pdf]

Figure A1. Microsatellite-based PCR multiplex: A) Profile of eight peaks typical for *A. fumigatus*; B) Profile obtained in species belonging to *Aspergillus* section *Fumigati*.
